# Supplementary material for: Exploring Three PIPs and Three TIPs of Grapevine for Transport of Water and Atypical Substrates through Heterologous Expression in aqy-null Yeast
Source: PubMed Central journal article supplement (PMC4128642; doi:10.1371/journal.pone.0102087), 2014-08-11

**Figure S2. Comparison of N- (A) and C- (B) terminals of PIP1s, PIP2s and TIPs aquaporins.** Aquaporins cloned in the present study are marked with red arrows. Accession numbers of presented protein sequences are: *At*PIP2;1 (P43286), *At*-deltaTIP2 (CAB10515), *At*-gammaTIP3 (AAC62778), *At*-epsilonTIP (AAC42249), *Fa*PIP2;1 (ADJ67992), *Pv*-alphaTIP (CAA44669), *So*PIP2;1 (4JC6\_N), *VvPn*PIP1;1 (CAO41326), *VvTn*PIP1;1 (HQ913643), *VvPn*PIP1;4 (CAO39626), *VvTn*PIP1;4 (KJ697714), *VvPn*PIP2;1 (CAN75442), *VvTn*PIP2;1 (KJ697715), *VvPn*PIP2;2 (CAO47394), *VvTn*PIP2;2 (HQ913642), *VvPn*PIP2;3 (CAO18152), *VvTn*PIP2;3 (KJ697716), *VvPn*TIP1;1 (CAO69259), *VvTn*TIP1;1 (KJ697717), *VvPn*TIP2;1 (CAO45860), *VvTn*TIP2;1 (HQ913640), *VvPn*TIP2;2 (CAO23095), *VvTn*TIP2;2 (KJ697718), *VvPn*TIP4;1 (CAO44039), *VvTn*TIP4;1 (KJ697719), *Zm*PIP2;1 (Q84RL7), *Zm*PIP2;5 (Q9XF58). *At*: *Arabidopsis thaliana*, *Fa*: *Fragaria x ananassa*, *Pv*: *Phaseolus vulgaris*, *So*: *Spinacia oleracea*, *VvPn*: *Vitis vinifera* cv. Pinot noir, *VvTn*: *V. vinifera* cv. Touriga nacional.

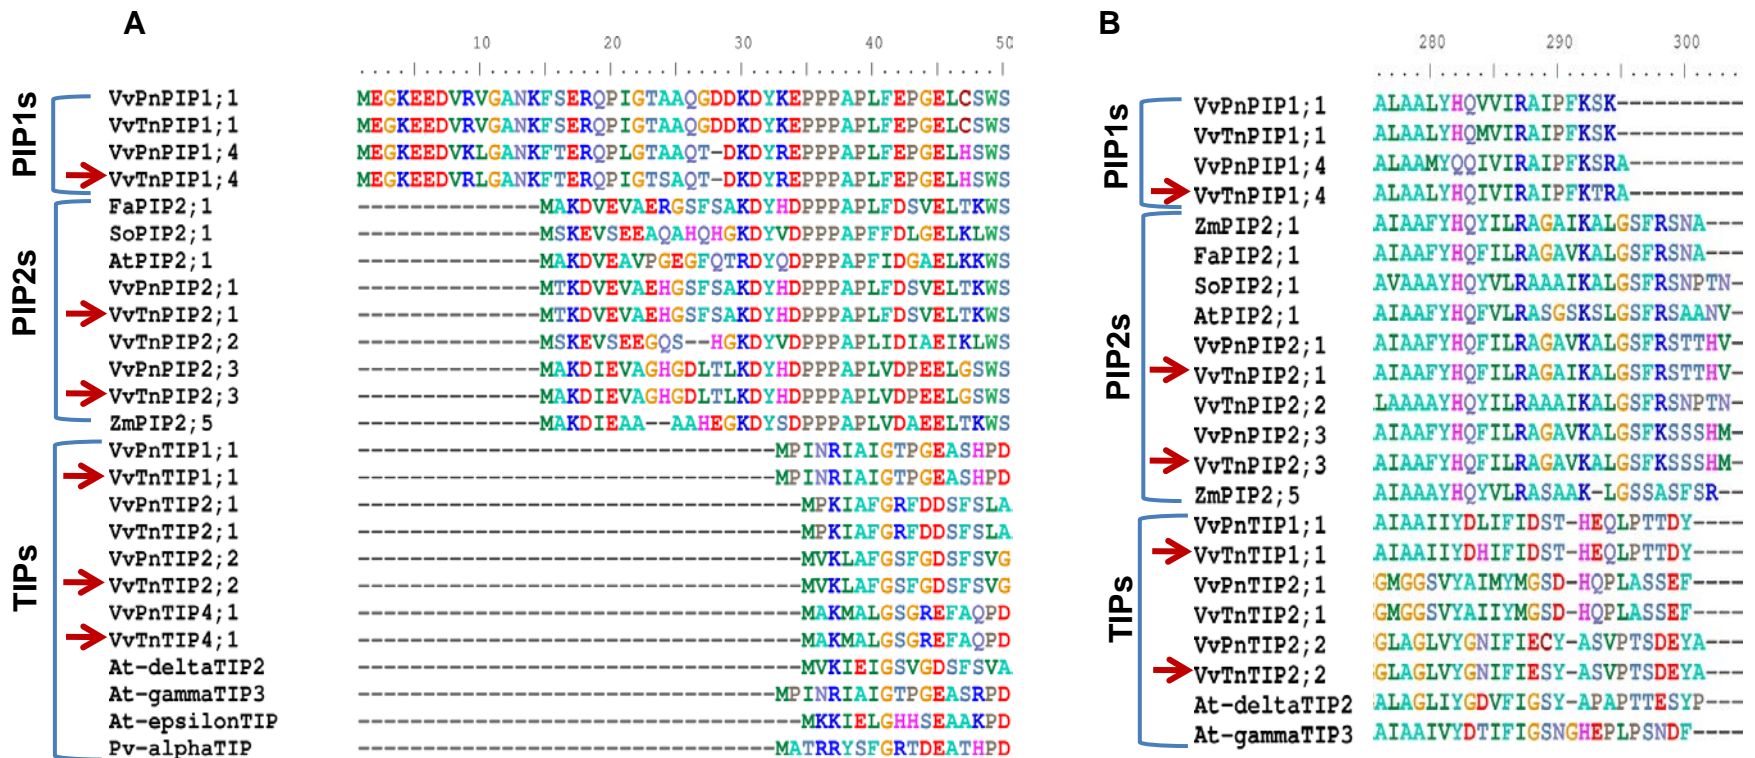

Supplement: pone.0102087.s002.pdf [file pone.0102087.s002.pdf]
