# Supplementary material for: Exploring Three PIPs and Three TIPs of Grapevine for Transport of Water and Atypical Substrates through Heterologous Expression in aqy-null Yeast
Source: PubMed Central journal article supplement (PMC4128642; doi:10.1371/journal.pone.0102087), 2014-08-11

**Figure S3. Presence of methylation and sorting signal sequences (D/E-X-D/E) at N-terminal (A) and pH regulation site (His residue) for gating (B) of PIPs aquaporins.** Consensus sequences are framed and conserved residues are indicated as red triangle. Aquaporins cloned in the present study are marked with red arrows. Accession numbers of presented protein sequences are: *At*PIP2;1 (P43286), *At*PIP1;2 (Q06611), *At*PIP1;4 (Q39196), *Fa*PIP2;1 (ADJ67992), *So*PIP2;1 (4JC6\_N), *VvPn*PIP1;1 (CAO41326), *VvTn*PIP1;1 (HQ913643), *VvPn*PIP1;4 (CAO39626), *VvTn*PIP1;4 (KJ697714), *VvPn*PIP2;1 (CAN75442), *VvTn*PIP2;1 (KJ697715), *VvPn*PIP2;2 (CAO47394), *VvTn*PIP2;2 (HQ913642), *VvPn*PIP2;3 (CAO18152), *VvTn*PIP2;3 (KJ697716), *Zm*PIP2;1 (Q84RL7), *Zm*PIP2;5 (Q9XF58), *Zm*PIP2;4 (Q9ATM6). *At*: *Arabidopsis thaliana*, *Fa*: *Fragaria x ananassa*, *So*: *Spinacia oleracea*, *VvPn*: *Vitis vinifera* cv. Pinot noir, *VvTn*: *V. vinifera* cv. Touriga nacional, *Zm*: *Zea mays*.

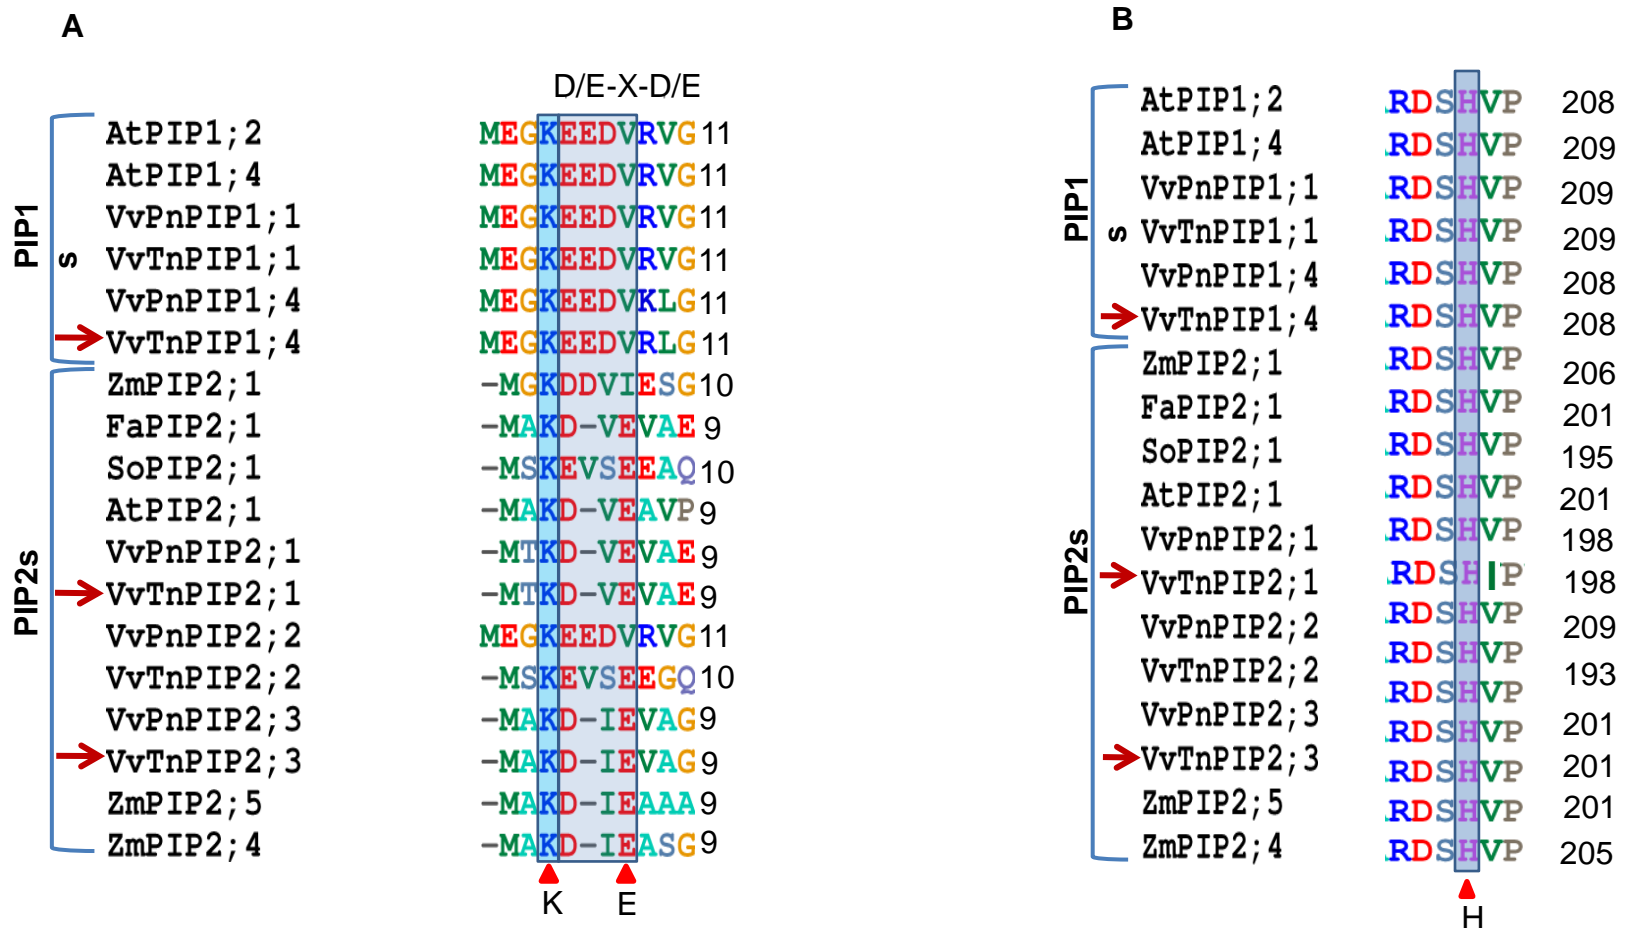

Supplement: pone.0102087.s003.pdf [file pone.0102087.s003.pdf]
