# Supplementary material for: Exploring Three PIPs and Three TIPs of Grapevine for Transport of Water and Atypical Substrates through Heterologous Expression in aqy-null Yeast
Source: PubMed Central journal article supplement (PMC4128642; doi:10.1371/journal.pone.0102087), 2014-08-11
Supplement: pone.0102087.s004.pdf [file pone.0102087.s004.pdf]

**Figure S4. Putative phosphorylation sites in aquaporins.** Ser residue in PIPs and Thr residue in TIPs aquaporins in loop B (A), loop D (B) and C-terminal (C) are tentative phosphorylation sites. Consensus sequences are framed and conserved residues are indicated as red triangle. Aquaporins cloned in the present study are marked with red arrows. Accession numbers of presented protein sequences are: *At*PIP1;2 (Q06611), *At*PIP1;4 (Q39196), *At*PIP2;1 (P43286), *At*-deltaTIP2 (CAB10515), *At*-gammaTIP3 (AAC62778), *At*-alphaTIP (AAC42249), *Fa*PIP2;1 (ADJ67992), *So*PIP2;1 (4JC6\_N), *VvPn*PIP1;1 (CAO41326), *VvTn*PIP1;1 (HQ913643), *VvPn*PIP1;4 (CAO39626), *VvTn*PIP1;4 (KJ697714), *VvPn*PIP2;1 (CAN75442), *VvTn*PIP2;1 (KJ697715), *VvPn*PIP2;2 (CAO47394), *VvTn*PIP2;2 (HQ913642), *VvPn*PIP2;3 (CAO18152), *VvTn*PIP2;3 (KJ697716), *VvPn*TIP1;1 (CAO69259), *VvTn*TIP1;1 (KJ697717), *VvPn*TIP2;1 (CAO45860), *VvTn*TIP2;1 (HQ913640), *VvPn*TIP2;2 (CAO23095), *VvTn*TIP2;2 (KJ697718), *VvPn*TIP4;1 (CAO44039), *VvTn*TIP4;1 (KJ697719), *Zm*PIP2;1 (Q84RL7), *Zm*PIP2;4 (Q9ATM6), *Zm*PIP2;5 (Q9XF58). *At*: *Arabidopsis thaliana*, *Fa*: *Fragaria x ananassa*, *Pv*: *Phaseolus vulgaris*, *So*: *Spinacia oleracea*, *VvPn*: *Vitis vinifera* cv. Pinot noir, *VvTn*: *V. vinifera* cv. Touriga nacional, *Zm*: *Zea mays*.

A

RK-X-S-XX-R/K

|       |               |               |
|-------|---------------|---------------|
| PIP1s | AtPIP1;2      | LARKLSLTRAVY  |
|       | AtPIP1;4      | LARKLSLTRAVF  |
|       | VvPnPPIP1;1   | LARKLSLTRAVY  |
|       | VvTnPPIP1;1   | LARKLSLTRAVY  |
| PIP2s | VvPnPPIP1;4   | LARKLSLTRAVF  |
|       | VvTnPPIP1;4   | LARKLSLTRAVF  |
|       | ZmPIP2;1      | LARKVSLVRALL  |
|       | FaPIP2;1      | LARKVSLVRAVM  |
| TIPS  | SoPIP2;1      | LARKVSLLRALV  |
|       | AtPIP2;1      | LARKVSLPRALL  |
|       | VvPnPPIP2;1   | LARKVSLIRAIL  |
|       | VvTnPPIP2;1   | LARKVSLIRAIL  |
| PIP1s | VvPnPPIP2;2   | LARKLSLTRAVY  |
|       | VvTnPPIP2;2   | LARKVSLIRALA  |
|       | VvPnPPIP2;3   | LARKVSLVRAVM  |
|       | VvTnPPIP2;3   | LARKVSLVRAVM  |
| PIP2s | ZmPIP2;5      | LARKVSLVRALL  |
|       | ZmPIP2;4      | LARKVSLVRALL  |
|       | VvPnPPIP2;1   | IGGHITLLRGIL  |
|       | VvTnPPIP2;1   | IGGHITLLRGIL  |
| TIPS  | VvPnPPIP2;1   | VGGQITILTGIL  |
|       | VvTnPPIP2;1   | VGGQITILTGIL  |
|       | VvPnPPIP2;2   | IGGHITILTGIF  |
|       | VvTnPPIP2;2   | IGGHITILTGIF  |
| PIP1s | VvPnPPIP4;1   | VGGHITVVRSVL  |
|       | VvTnPPIP4;1   | VGGHITVVRSVL  |
|       | At-deltaTIP2  | VGGNITVITGFF  |
|       | At-gammaTIP3  | IGGNITLLRAIL  |
| TIPS  | At-epsilonTIP | LGGHISVFR AFL |
|       | Pv-alphaTIP   | IGGRISVIRAVY  |

S/T

B

N/S-ARDSH

|       |               |          |
|-------|---------------|----------|
| PIP1s | AtPIP1;2      | KRNARDSH |
|       | AtPIP1;4      | KRSARDSH |
|       | VvPnPPIP1;1   | KRNARDSH |
|       | VvTnPPIP1;1   | KRNARDSH |
| PIP2s | VvPnPPIP1;4   | KRNARDSH |
|       | VvTnPPIP1;4   | KRNARDSH |
|       | ZmPIP2;1      | KRNARDSH |
|       | FaPIP2;1      | KRSARDSH |
| TIPS  | SoPIP2;1      | KRSARDSH |
|       | AtPIP2;1      | KRSARDSH |
|       | VvPnPPIP2;1   | KRSARDSH |
|       | VvTnPPIP2;1   | KRSARDSH |
| PIP1s | VvPnPPIP2;2   | KRNARDSH |
|       | VvTnPPIP2;2   | KRSARDSH |
|       | VvPnPPIP2;3   | KRNARDSH |
|       | VvTnPPIP2;3   | KRNARDSH |
| PIP2s | ZmPIP2;5      | KRNARDSH |
|       | ZmPIP2;4      | KRSARDSH |
|       | VvPnPPIP1;1   | PKK---GN |
|       | VvTnPPIP1;1   | PKK---GN |
| TIPS  | VvPnPPIP2;1   | PKK---GS |
|       | VvTnPPIP2;1   | PKK---GS |
|       | VvPnPPIP2;2   | PKK---GS |
|       | VvTnPPIP2;2   | PKK---GS |
| PIP1s | VvPnPPIP4;1   | AQKS--AH |
|       | VvTnPPIP4;1   | AQKS--AH |
|       | At-deltaTIP2  | PKK---GS |
|       | At-gammaTIP3  | PKK---GD |
| TIPS  | At-epsilonTIP | PKK---GS |
|       | Pv-alphaTIP   | PKR---GA |

S

S

C

K-K/X-XX-S-X-R/K-S

|       |               |                   |
|-------|---------------|-------------------|
| PIP1s | AtPIP1;2      | PFKSRS-----       |
|       | AtPIP1;4      | PFKSKS-----       |
|       | VvPnPPIP1;1   | PFKSK-----        |
|       | VvTnPPIP1;1   | PFKSK-----        |
| PIP2s | VvPnPPIP1;4   | PFKSRA-----       |
|       | VvTnPPIP1;4   | PFKTRA-----       |
|       | ZmPIP2;1      | AIKALGSFRSNA----  |
|       | FaPIP2;1      | AVKALGSFRSNA----  |
| TIPS  | SoPIP2;1      | AIKALGSFRSNPTN--  |
|       | AtPIP2;1      | GSKSLGSFRSAAV--   |
|       | VvPnPPIP2;1   | AVKALGSFRSTTHV--  |
|       | VvTnPPIP2;1   | AIKALGSFRSTTHV--  |
| PIP1s | VvPnPPIP2;2   | PFKSK-----        |
|       | VvTnPPIP2;2   | AIKALGSFRSNPTN--  |
|       | VvPnPPIP2;3   | AVKALGSFKSSSHM--  |
|       | VvTnPPIP2;3   | AVKALGSFKSSSHM--  |
| PIP2s | ZmPIP2;5      | AAK-LGSSASF SR--- |
|       | ZmPIP2;4      | ATK-LGSYRSNA----  |
|       | VvPnPPIP1;1   | T-----HEQLPTTDY-  |
|       | VvTnPPIP1;1   | T-----HEQLPTTDY-  |
| TIPS  | VvPnPPIP2;1   | D-----HQPLASSEF-  |
|       | VvTnPPIP2;1   | D-----HQPLASSEF-  |
|       | VvPnPPIP2;2   | Y-----ASVPTSDEYA  |
|       | VvTnPPIP2;2   | Y-----ASVPTSDEYA  |
| PIP1s | VvPnPPIP4;1   | PHLRLPTRDEEEEEGF  |
|       | VvTnPPIP4;1   | PHLRLPTRDEEEEEGF  |
|       | At-deltaTIP2  | Y-----APAPTTESYF  |
|       | At-gammaTIP3  | NG-----HEPLPSNDF- |
| TIPS  | At-epsilonTIP | PHV--PVADDEQPLLN  |
|       | Pv-alphaTIP   | EPPPHHHQPLATEDY-  |

S

S
