# Supplementary material for: Exploring Three PIPs and Three TIPs of Grapevine for Transport of Water and Atypical Substrates through Heterologous Expression in aqy-null Yeast
Source: PubMed Central journal article supplement (PMC4128642; doi:10.1371/journal.pone.0102087), 2014-08-11
Supplement: pone.0102087.s006.pdf [file pone.0102087.s006.pdf]

**Figure S6. Consensus sequences for transport of boron and CO<sub>2</sub>.** Alignment of putative amino acids of aquaporins of *V. Vinifera* (cv. Touriga nacional) obtained from present study and previous study (Leitão, 2012) with the sequences of aquaporins reported to transport (A) boron and (B) CO<sub>2</sub>. ar/R constrictions and P1-P5 positions are shown to demonstrate the conserved amino acid residue. Accession numbers of presented protein sequences are: *At*PIP1;2 (Q06611), *At*NIP5;1 (NP\_192776), *Hv*PIP1;3 (BAA23745), *Hv*PIP2;1 (BAA23744), *Nt*AQP1 (O24662), *Os*NIP2;1 (Q6Z2T3), *VvTn*PIP1;1 (HQ913643), *VvTn*PIP1;4 (KJ697714), *VvTn*PIP2;1 (KJ697715), *VvTn*PIP2;2 (HQ913642), *VvTn*PIP2;3 (KJ697716), *VvTn*TIP1;1 (KJ697717), *VvTn*TIP2;1 (HQ913640), *VvTn*TIP2;2 (KJ697718), *VvTn*TIP4;1 (KJ697719), *Zm*PIP1;1 (Q41870). *At*: *Arabidopsis thaliana*, *Hv*: *Hordeum vulgare*, *VvTn*: *V. vinifera* (cv. Touriga nacional), *Zm*: *Zea mays*.

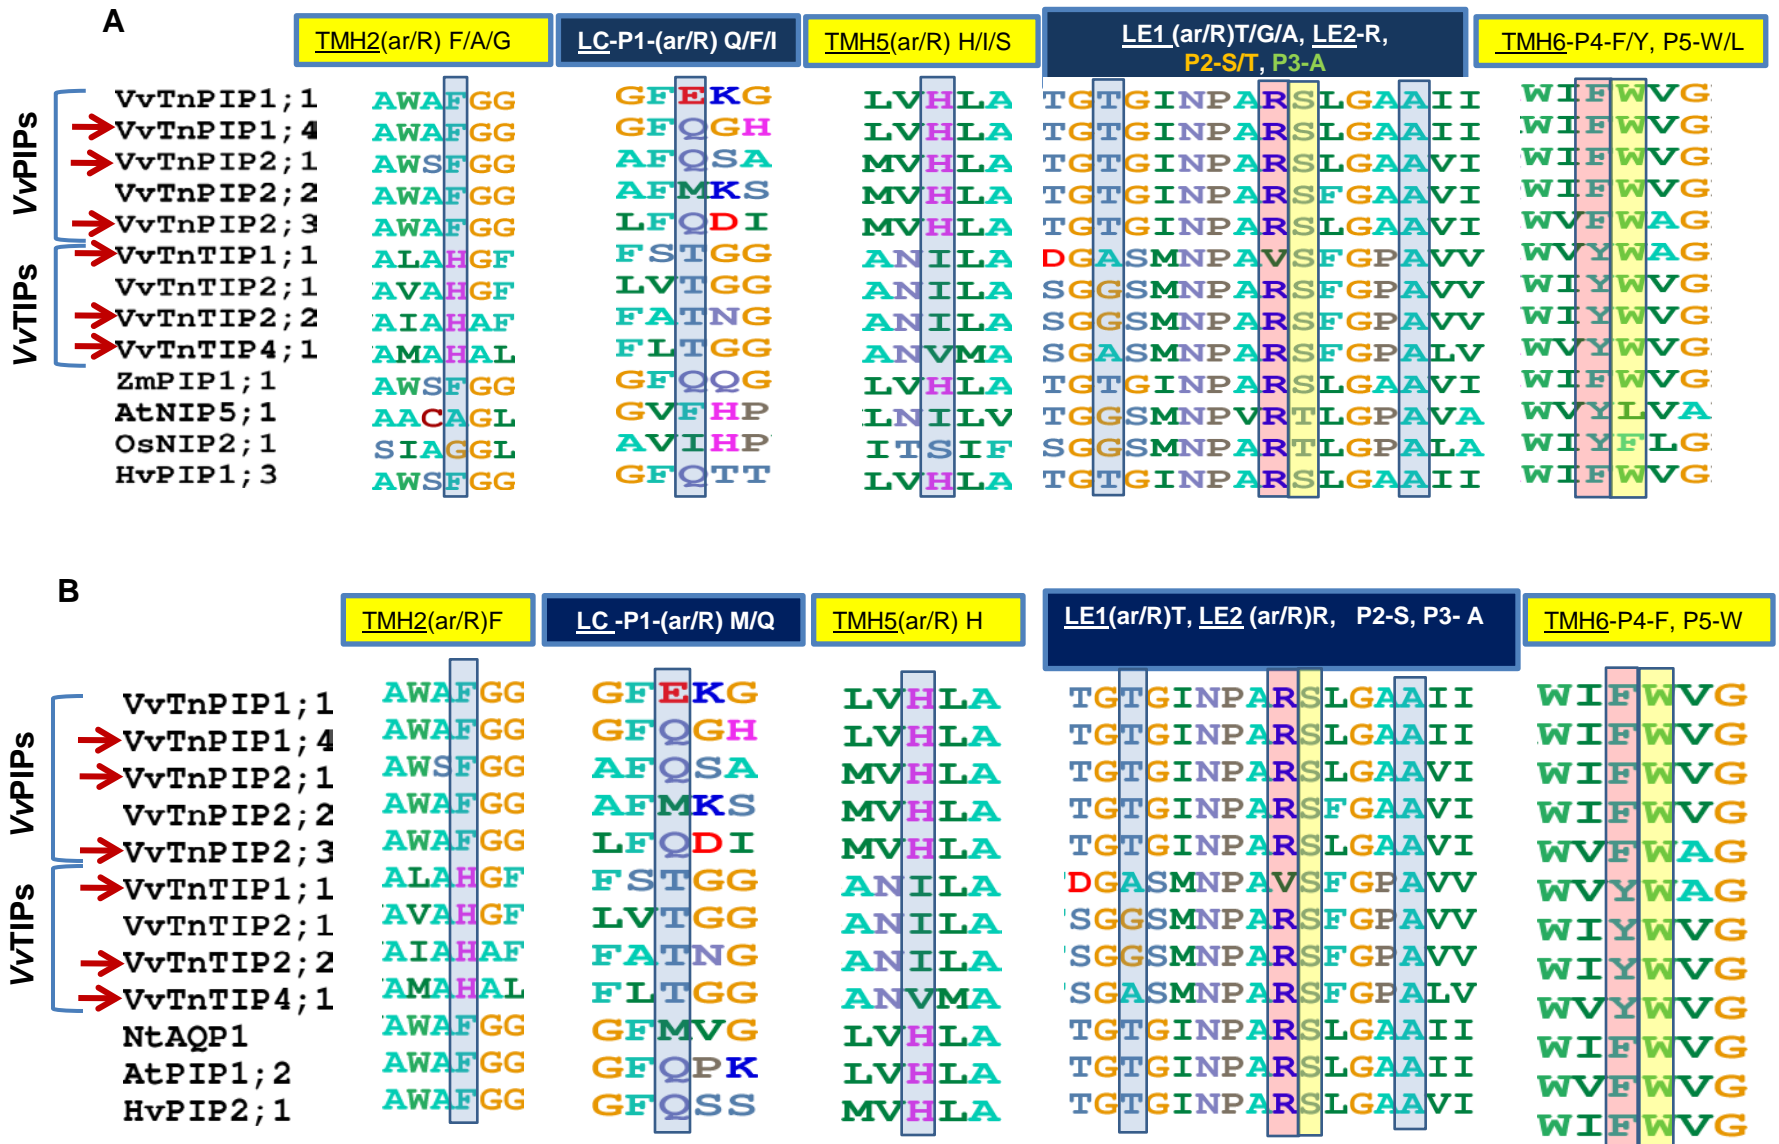

### Supplementary references

Leitão L, Prista C, Moura TF, Loureiro-Dias MC, Soveral G (2012) Grapevine aquaporins: gating of a tonoplast intrinsic protein (TIP2;1) by cytosolic pH. PLoS One 7: e33219.
