# Supplementary material for: Exploring Three PIPs and Three TIPs of Grapevine for Transport of Water and Atypical Substrates through Heterologous Expression in aqy-null Yeast
Source: PubMed Central journal article supplement (PMC4128642; doi:10.1371/journal.pone.0102087), 2014-08-11
Supplement: pone.0102087.s008.pdf [file pone.0102087.s008.pdf]

**Figure S8. Consensus sequences for transport of H<sub>2</sub>O<sub>2</sub> and urea.** Alignment of putative amino acids of aquaporins of *V. Vinifera* (cv. Touriga nacional) obtained from present study and previous study (Leitão, 2012) with sequences of aquaporins reported to transport (A) H<sub>2</sub>O<sub>2</sub> and (B) urea. ar/R constrictions and P1-P5 positions are shown to demonstrate the conserved amino acid residue. Accession numbers of presented protein sequences are: *AfTIP1;1* (P25818), *AfTIP1;2* (Q41963), *AfTIP1;3* (NP\_192056), *AfTIP2;1* (Q41951), *AfTIP2;3* (Q9FGL2), *AtPIP2;4* (Q9FF53), *CpNIP1* (CAD67694), *NtAQP1* (O24662), *NtTIPa* (Q9XG70), *OsNIP2;1* (Q6Z2T3), *VvTnPIP1;1* (HQ913643), *VvTnPIP1;4* (KJ697714), *VvTnPIP2;1* (KJ697715), *VvTnPIP2;2* (HQ913642), *VvTnPIP2;3* (KJ697716), *VvTnTIP1;1* (KJ697717), *VvTnTIP2;1* (HQ913640), *VvTnTIP2;2* (KJ697718), *VvTnTIP4;1* (KJ697719), *ZmPIP1;5* (Q9AR14). *At*: *Arabidopsis thaliana*, *Cp*: *Cucurbita pepo*, *Nt*: *Nicotiana tabacum*, *Os*: *Oryza sativa*, *VvTn*: *Vitis vinifera* (cv. Touriga nacional), *Zm*: *Zea mays*.

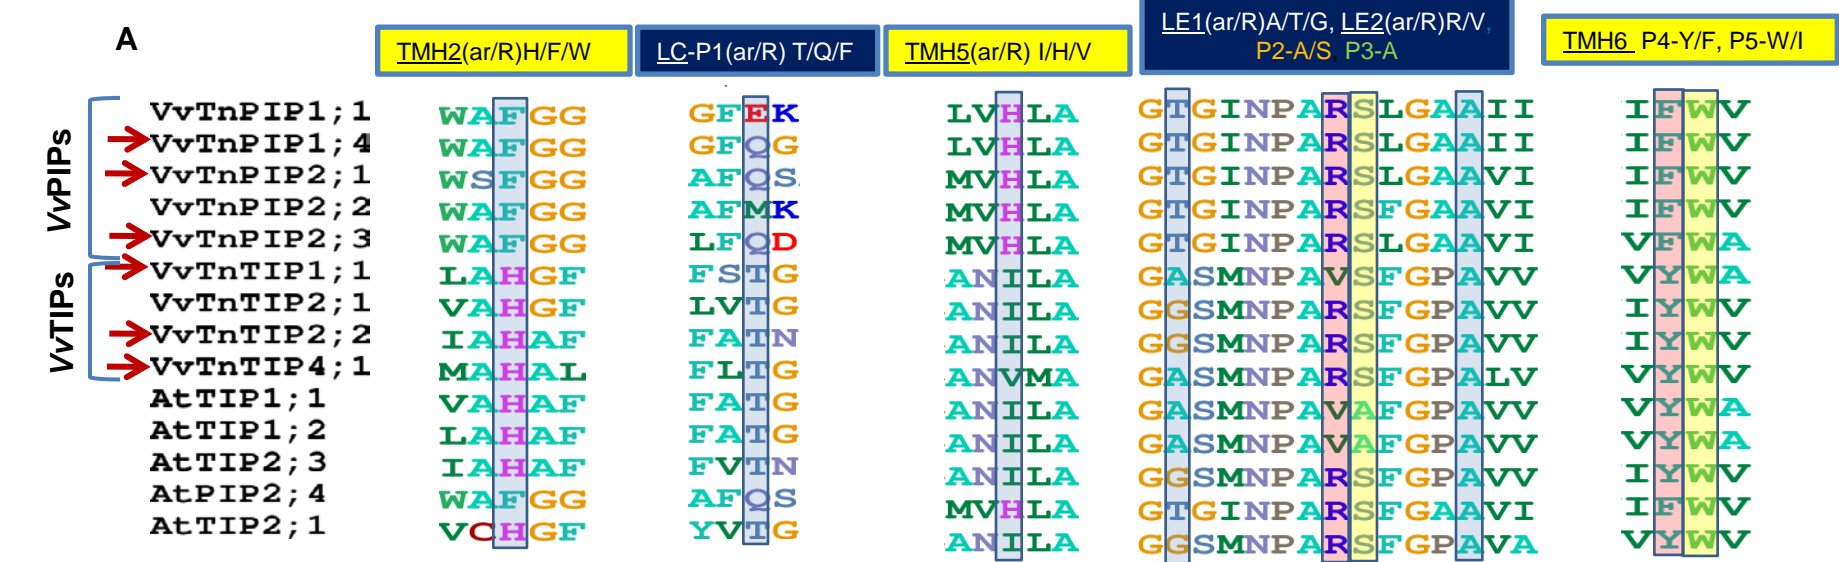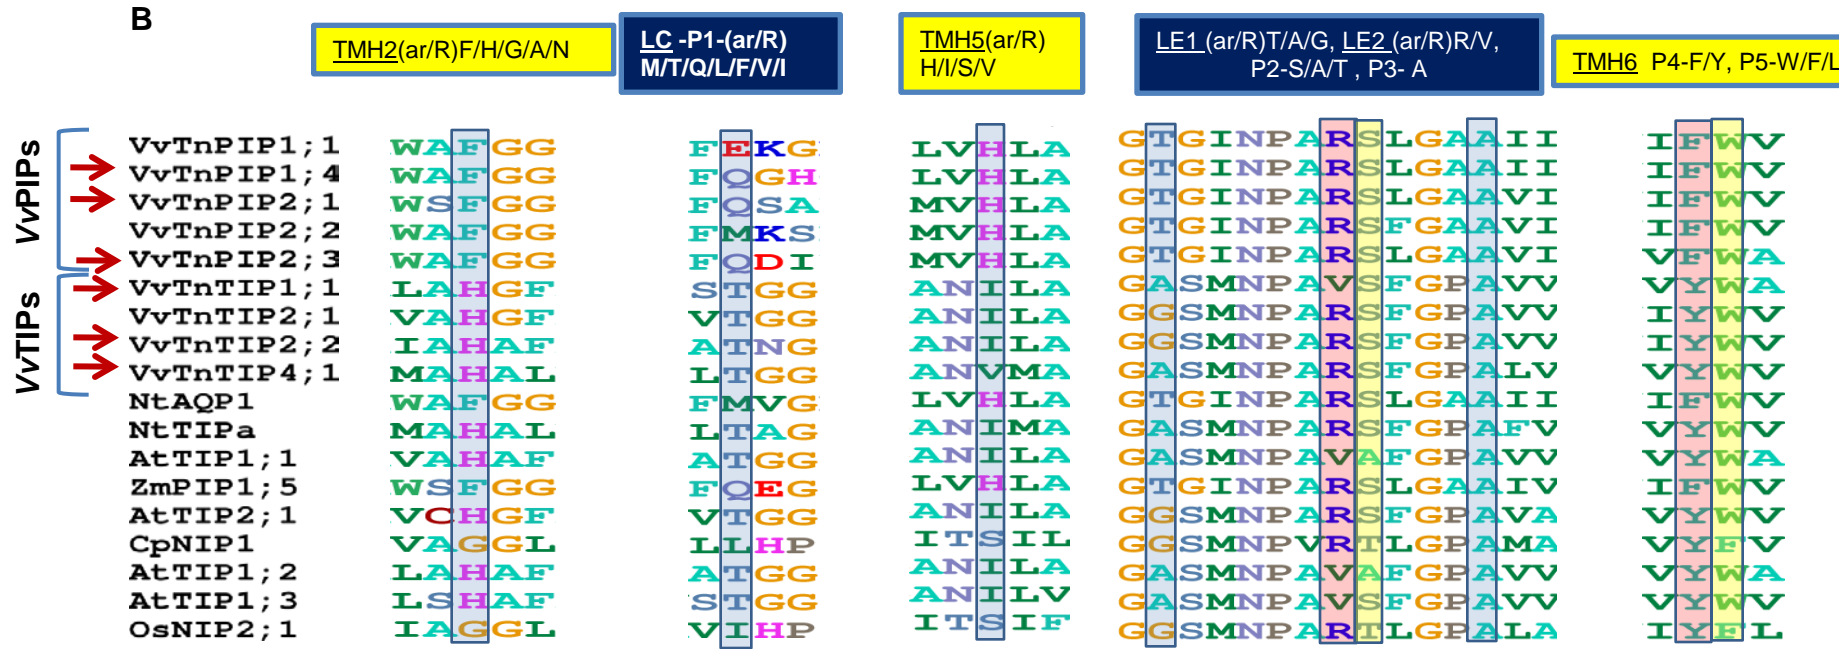

**Supplementary references**

Leitão L, Prista C, Moura TF, Loureiro-Dias MC, Soveral G (2012) Grapevine aquaporins: gating of a tonoplast intrinsic protein (TIP2;1) by cytosolic pH. PLoS One 7: e33219.
