# Supplementary material for: Exploring Three PIPs and Three TIPs of Grapevine for Transport of Water and Atypical Substrates through Heterologous Expression in aqy-null Yeast
Source: PubMed Central journal article supplement (PMC4128642; doi:10.1371/journal.pone.0102087), 2014-08-11
Supplement: pone.0102087.s009.pdf [file pone.0102087.s009.pdf]

**Table S1.** Primers used in this work (restriction sites are underlined).

| Genes to amplify | Primer name | Primer sequence (5'-3')                                    | Restriction enzyme |
|------------------|-------------|------------------------------------------------------------|--------------------|
| <i>PIP1;4</i>    | P14 Frwd    | GCGAGC <u>CTAGACT</u> CAGAAAAATGGAGGGGAAGGAAGAGGATGTGAGG   | <i>Xba</i> I       |
|                  | P14 Rev     | ATACGCG <u>TCGAC</u> GGCTCTGGTCTTGAATGGGATAGC              | <i>Sal</i> I       |
| <i>PIP2;1</i>    | P21 Frwd    | GGTAGC <u>CTAGA</u> ATGACTAAGGACGTTGAGGTTGCG               | <i>Xba</i> I       |
|                  | P21 Rev     | ATACGCG <u>TCGAC</u> TACATGAGTGGTGCTCCTG                   | <i>Sal</i> I       |
| <i>PIP2;3</i>    | P23 Frwd    | AGTAGC <u>CTAGA</u> ATGGCCAAGGACATTGAGGTTGCAGG             | <i>Xba</i> I       |
|                  | P23 Rev     | TACACC <u>ATCGAT</u> CATGTGGGAACTGCTCTTGAAAGACCCTAGAG      | <i>Cla</i> I       |
| <i>TIP1;1</i>    | T11 Frwd    | GCGAGC <u>CTAGA</u> AAGGGCAAGCCTTTAATAAAAAATGCC            | <i>Xba</i> I       |
|                  | T11 Rev     | GTACGCG <u>TCGAC</u> ATAATCCGTGGTGGGCAGTT                  | <i>Sal</i> I       |
| <i>TIP2;2</i>    | T22 Frwd    | GCGAGC <u>CTAGAT</u> GACCAAAAATGGTGAAGCTTGCCTTTGGTAGCTTTGG | <i>Xba</i> I       |
|                  | T22 Rev     | GTACGCG <u>TCGAC</u> AGCATATTCATCGGAGGTGG                  | <i>Sal</i> I       |
| <i>TIP4;1</i>    | T41 Frwd    | GCGAGC <u>CTAGAC</u> ATTCTCTCTCAACATGGCCAAGATG             | <i>Xba</i> I       |
|                  | T41 Rev     | GTACGCG <u>TCGAC</u> GAAGCCTTCTTCTTCTTCTTCGTCTC            | <i>Sal</i> I       |
